# Supplementary material for: Epidemiological Survey of Human Alphaherpesvirus 2 (HSV-2) Infection in Indigenous People of Dourados Municipality, Central Brazil
Source: MDPI journal article supplement (doi:10.3390/tropicalmed8040197), 2023-03-29
Supplement: s1 [file s1]

# Questionnaire: Indigenous Population

| <b>FEDERAL UNIVERSITY OF GRANDE DOURADOS</b><br><b>GRADUATE PROGRAM IN HEALTH SCIENCES</b><br><b>MULTICENTRIC STUDY OF INFECTIOUS DISEASES IN THE INDIGENOUS POPULATION OF THE DOURADOS-MS RESERVE</b>                                                                                                                                                                                                                                                                                                                                                                                         |  |  |
|------------------------------------------------------------------------------------------------------------------------------------------------------------------------------------------------------------------------------------------------------------------------------------------------------------------------------------------------------------------------------------------------------------------------------------------------------------------------------------------------------------------------------------------------------------------------------------------------|--|-------------------------------------------------------------------------------------|
| <b>BLOCK A - GENERAL INFORMATION</b>                                                                                                                                                                                                                                                                                                                                                                                                                                                                                                                                                           |  |                                                                                     |
| 1. Questionnaire number: ____ _<br>2. Responsible for data collection : _____<br>3. Date of data collection : ____/____/____<br>4. Typist : _____<br>5. Typing date : ____/____/____<br>6. City: _____<br>7. Village: _____<br>8. Residence/House : _____                                                                                                                                                                                                                                                                                                                                      |  |                                                                                     |
| 9. Type of housing? _____                                                                                                                                                                                                                                                                                                                                                                                                                                                                                                                                                                      |  | HOW IS YOUR HOME? ( ) Wood ( ) shack ( ) brick                                      |
| 10. Does the house have running water?<br>(1) Yes _____<br>(2) No _____<br>11. If the answer is no, how is the water supply? _____<br>_____<br>12. Name: _____<br>11. How long have you lived in the village? (months) _____<br>12 Which village did you previously live in? _____<br>13. What religion? _____<br>14. Do you receive benefits such as family allowance and retirement?<br>(1) Yes _____<br>(2) No _____<br>15. What benefits do you receive? _____<br>16. What means of communication do you use?<br>( ) Cell Phone<br>( ) Radio<br>( ) TV<br>( ) internet<br>17. Gender: ____ |  | How do you get water?<br>Ask for identification document, to be reliable data       |
| 18. Birth date : ____/____/____                                                                                                                                                                                                                                                                                                                                                                                                                                                                                                                                                                |  |                                                                                     |
| <b>BLOCK B - SOCIAL DEMOGRAPHIC INFORMATION</b>                                                                                                                                                                                                                                                                                                                                                                                                                                                                                                                                                |  |                                                                                     |
| 19. Naturalness : _____<br>20. What state were you born in? ____<br>21. What is your ethnicity? __ (1) Guarani-Kaiwá (2) Guarani-Nhandeva (3) Terena (4) Kadiwéu (5) Guató (6) Kinikinaw (7) Ofaié (8) Other (_____)                                                                                                                                                                                                                                                                                                                                                                           |  |                                                                                     |
| 22. You're? __ (1) Married or living with a partner (2) Widowed (3) Separated/divorced (4) Single                                                                                                                                                                                                                                                                                                                                                                                                                                                                                              |  | Until what year did you study?                                                      |

## Questionnaire: Indigenous Population

| <p>23. What was the last school grade you attended? ? _____</p> <p>23. It works? (1) Yes (2) No</p> <p>24. What is the monthly income of everyone in the family: R\$ _____ per month</p> <p>25. How many people live with you? ____</p> <p>26. Have you ever been arrested? ____ (1) Yes (2) No</p>                                                                                                                                                                                                                                                                                                                                                                                                                                                                                                                                                                                                                                                                                                                                                                                                                                                                                                                                                                                                                                                                                                                                                                                                                                                                                                                                                                                |                                                         |                                                         |         |     |           |     |         |     |               |     |        |     |                             |     |            |     |         |     |                                      |     |  |
|------------------------------------------------------------------------------------------------------------------------------------------------------------------------------------------------------------------------------------------------------------------------------------------------------------------------------------------------------------------------------------------------------------------------------------------------------------------------------------------------------------------------------------------------------------------------------------------------------------------------------------------------------------------------------------------------------------------------------------------------------------------------------------------------------------------------------------------------------------------------------------------------------------------------------------------------------------------------------------------------------------------------------------------------------------------------------------------------------------------------------------------------------------------------------------------------------------------------------------------------------------------------------------------------------------------------------------------------------------------------------------------------------------------------------------------------------------------------------------------------------------------------------------------------------------------------------------------------------------------------------------------------------------------------------------|---------------------------------------------------------|---------------------------------------------------------|---------|-----|-----------|-----|---------|-----|---------------|-----|--------|-----|-----------------------------|-----|------------|-----|---------|-----|--------------------------------------|-----|--|
| <b>BLOCK C – NUTRITIONAL HISTORY</b>                                                                                                                                                                                                                                                                                                                                                                                                                                                                                                                                                                                                                                                                                                                                                                                                                                                                                                                                                                                                                                                                                                                                                                                                                                                                                                                                                                                                                                                                                                                                                                                                                                               |                                                         |                                                         |         |     |           |     |         |     |               |     |        |     |                             |     |            |     |         |     |                                      |     |  |
| <p>29. What's your weight? ____</p> <p>30. What's your height? ____</p> <p>31. Do you take any medication? ____ (1) Yes (2) No</p> <p>32. If yes, specify which medication you use? _____</p> <p><b><u>Drug and alcohol history</u></b></p> <p>33 You smoke? ____ (1) Yes (2) No. If not, skip to question 37.</p> <p>34. If yes, at what age did you start? ____</p> <p>35. If yes, how many cigarettes do you smoke per day? ____</p> <p><b>If the respondent smokes, skip to question 37.</b></p> <p>36. Have you ever smoked? ____ (1) Yes (2) No</p> <p><b>Have you ever used any of the following drugs:</b></p> <table border="1" style="width: 100%; border-collapse: collapse; margin-top: 10px;"> <thead> <tr> <th style="width: 35%;"></th> <th style="width: 65%;">Have you used it in the last year?<br/>(1) Yes<br/>(2) No</th> </tr> </thead> <tbody> <tr> <td>Alcohol</td> <td>37.</td> </tr> <tr> <td>Marihuana</td> <td>38.</td> </tr> <tr> <td>Cocaine</td> <td>39.</td> </tr> <tr> <td>Crack (stone)</td> <td>40.</td> </tr> <tr> <td>Heroin</td> <td>41.</td> </tr> <tr> <td>Sniffed glue/other solvents</td> <td>42.</td> </tr> <tr> <td>Base paste</td> <td>43.</td> </tr> <tr> <td>Hashish</td> <td>44.</td> </tr> <tr> <td>Did you inject any drugs? Which are:</td> <td>45.</td> </tr> </tbody> </table> <p><b>If male: If not, skip to question 53.</b></p> <p>46. Have you ever had a prostate exam? ( ) Yes No</p> <p>47. If so, which one? ( ) digital rectal examination ( ) blood test (psa) ( ) ultrasound ( ) biopsy</p> <p>48. Do you have cancer in the family? ( ) Yes No</p> <p>49. If so, what cancer was diagnosed? _____</p> <p>_____</p> |                                                         | Have you used it in the last year?<br>(1) Yes<br>(2) No | Alcohol | 37. | Marihuana | 38. | Cocaine | 39. | Crack (stone) | 40. | Heroin | 41. | Sniffed glue/other solvents | 42. | Base paste | 43. | Hashish | 44. | Did you inject any drugs? Which are: | 45. |  |
|                                                                                                                                                                                                                                                                                                                                                                                                                                                                                                                                                                                                                                                                                                                                                                                                                                                                                                                                                                                                                                                                                                                                                                                                                                                                                                                                                                                                                                                                                                                                                                                                                                                                                    | Have you used it in the last year?<br>(1) Yes<br>(2) No |                                                         |         |     |           |     |         |     |               |     |        |     |                             |     |            |     |         |     |                                      |     |  |
| Alcohol                                                                                                                                                                                                                                                                                                                                                                                                                                                                                                                                                                                                                                                                                                                                                                                                                                                                                                                                                                                                                                                                                                                                                                                                                                                                                                                                                                                                                                                                                                                                                                                                                                                                            | 37.                                                     |                                                         |         |     |           |     |         |     |               |     |        |     |                             |     |            |     |         |     |                                      |     |  |
| Marihuana                                                                                                                                                                                                                                                                                                                                                                                                                                                                                                                                                                                                                                                                                                                                                                                                                                                                                                                                                                                                                                                                                                                                                                                                                                                                                                                                                                                                                                                                                                                                                                                                                                                                          | 38.                                                     |                                                         |         |     |           |     |         |     |               |     |        |     |                             |     |            |     |         |     |                                      |     |  |
| Cocaine                                                                                                                                                                                                                                                                                                                                                                                                                                                                                                                                                                                                                                                                                                                                                                                                                                                                                                                                                                                                                                                                                                                                                                                                                                                                                                                                                                                                                                                                                                                                                                                                                                                                            | 39.                                                     |                                                         |         |     |           |     |         |     |               |     |        |     |                             |     |            |     |         |     |                                      |     |  |
| Crack (stone)                                                                                                                                                                                                                                                                                                                                                                                                                                                                                                                                                                                                                                                                                                                                                                                                                                                                                                                                                                                                                                                                                                                                                                                                                                                                                                                                                                                                                                                                                                                                                                                                                                                                      | 40.                                                     |                                                         |         |     |           |     |         |     |               |     |        |     |                             |     |            |     |         |     |                                      |     |  |
| Heroin                                                                                                                                                                                                                                                                                                                                                                                                                                                                                                                                                                                                                                                                                                                                                                                                                                                                                                                                                                                                                                                                                                                                                                                                                                                                                                                                                                                                                                                                                                                                                                                                                                                                             | 41.                                                     |                                                         |         |     |           |     |         |     |               |     |        |     |                             |     |            |     |         |     |                                      |     |  |
| Sniffed glue/other solvents                                                                                                                                                                                                                                                                                                                                                                                                                                                                                                                                                                                                                                                                                                                                                                                                                                                                                                                                                                                                                                                                                                                                                                                                                                                                                                                                                                                                                                                                                                                                                                                                                                                        | 42.                                                     |                                                         |         |     |           |     |         |     |               |     |        |     |                             |     |            |     |         |     |                                      |     |  |
| Base paste                                                                                                                                                                                                                                                                                                                                                                                                                                                                                                                                                                                                                                                                                                                                                                                                                                                                                                                                                                                                                                                                                                                                                                                                                                                                                                                                                                                                                                                                                                                                                                                                                                                                         | 43.                                                     |                                                         |         |     |           |     |         |     |               |     |        |     |                             |     |            |     |         |     |                                      |     |  |
| Hashish                                                                                                                                                                                                                                                                                                                                                                                                                                                                                                                                                                                                                                                                                                                                                                                                                                                                                                                                                                                                                                                                                                                                                                                                                                                                                                                                                                                                                                                                                                                                                                                                                                                                            | 44.                                                     |                                                         |         |     |           |     |         |     |               |     |        |     |                             |     |            |     |         |     |                                      |     |  |
| Did you inject any drugs? Which are:                                                                                                                                                                                                                                                                                                                                                                                                                                                                                                                                                                                                                                                                                                                                                                                                                                                                                                                                                                                                                                                                                                                                                                                                                                                                                                                                                                                                                                                                                                                                                                                                                                               | 45.                                                     |                                                         |         |     |           |     |         |     |               |     |        |     |                             |     |            |     |         |     |                                      |     |  |

## Questionnaire: Indigenous Population

|                                                                                                                                                                                                                                                                                                                                                                                                                                                                                                                                                                                                                                                                                                                                                                                                                                                                                                                                                                                                                                                                                                                                                                                                                                                                                                                |  |
|----------------------------------------------------------------------------------------------------------------------------------------------------------------------------------------------------------------------------------------------------------------------------------------------------------------------------------------------------------------------------------------------------------------------------------------------------------------------------------------------------------------------------------------------------------------------------------------------------------------------------------------------------------------------------------------------------------------------------------------------------------------------------------------------------------------------------------------------------------------------------------------------------------------------------------------------------------------------------------------------------------------------------------------------------------------------------------------------------------------------------------------------------------------------------------------------------------------------------------------------------------------------------------------------------------------|--|
| <p>50. Is your diet high in fat? ( ) Yes No</p> <p>51. Do you have any urinary problems such as burning, weak stream, waking up at night to urinate or blood in the urine? ( ) Yes No</p> <p>52. If so, which ones? _____</p>                                                                                                                                                                                                                                                                                                                                                                                                                                                                                                                                                                                                                                                                                                                                                                                                                                                                                                                                                                                                                                                                                  |  |
| <b>BLOCK D - TUBERCULOSIS</b>                                                                                                                                                                                                                                                                                                                                                                                                                                                                                                                                                                                                                                                                                                                                                                                                                                                                                                                                                                                                                                                                                                                                                                                                                                                                                  |  |
| <b><u>History of tuberculosis-related signs and symptoms</u></b>                                                                                                                                                                                                                                                                                                                                                                                                                                                                                                                                                                                                                                                                                                                                                                                                                                                                                                                                                                                                                                                                                                                                                                                                                                               |  |
| <p>53. Do you have or have you had tuberculosis before? __ (1) Yes (2) No (3) Don't know. If not go to question 100</p> <p>54. How many treatments were performed?</p> <p>55. How long ago was the last treatment performed?__ __ months.</p> <p>56. How long ago was the last treatment performed?__ __ months. Type of discharge (last): __ (1) Cure (2) Abandonment (3) Don't know</p> <p>57. Do you know someone with TB? __ (1) Yes (2) No (3) Don't know.</p>                                                                                                                                                                                                                                                                                                                                                                                                                                                                                                                                                                                                                                                                                                                                                                                                                                            |  |
| <b>BLOCK E – SEXUALLY TRANSMITTED INFECTIONS</b>                                                                                                                                                                                                                                                                                                                                                                                                                                                                                                                                                                                                                                                                                                                                                                                                                                                                                                                                                                                                                                                                                                                                                                                                                                                               |  |
| <p>58. Do you have or have you had a sexually transmitted disease? __ (1) Yes (2) No (3) Don't know<br/>If not go to question 70</p> <p>59. How long ago was the last treatment performed?_____ months.</p> <p>60. Do you have HIV?__ (1) Yes (2) No</p> <p>61. If so, are you on antiretroviral treatment?</p> <p>62. Do you have hepatitis? __ (1) Yes (2) No</p> <p>63. Do you have syphilis? __ (1) Yes (2) No</p> <p>64. If yes, are you being medicated? __ (1) Yes (2) No</p> <p>65. Have you ever had syphilis?__ (1) Yes (2) No</p> <p>66. If so, did you take all three doses of the drug? __ (1) Yes (2) No</p> <p>67. If so, did the partner take all three doses of the drug? __ (1) Yes (2) No</p> <p>68. Has a test been offered for these diseases (HIV, viral hepatitis, syphilis)? __ (1) Yes (2) No</p> <p>69. If yes, for which:_____</p> <p>70. Have you ever had a blood transfusion? __ (1) Yes (2) No</p> <p>71. If so, what year?_____</p> <p>72. You have tattoo? __ (1) Yes (2) No</p> <p>73. If yes, how many?</p> <p>74. Do you have a piercing? __ (1) Yes (2) No</p> <p>75. Do you have a piercing? __ (1) Yes (2) No</p> <p>76. Do you have a sore on your penis or vagina? __ (1) Yes (2) No</p> <p>77. Do you have or have you had urethral discharge? __ (1) Yes (2) No</p> |  |

## Questionnaire: Indigenous Population

|                                                                                                                                                                                                                                                                                                                                                                                                                                                                                                                                                                                                                                                                                                                                                                                                                                                                                                                                                                                                                                                                                                                                                                                                                                                                                                                                                                                                                                                                                                                                                                                                                 |  |
|-----------------------------------------------------------------------------------------------------------------------------------------------------------------------------------------------------------------------------------------------------------------------------------------------------------------------------------------------------------------------------------------------------------------------------------------------------------------------------------------------------------------------------------------------------------------------------------------------------------------------------------------------------------------------------------------------------------------------------------------------------------------------------------------------------------------------------------------------------------------------------------------------------------------------------------------------------------------------------------------------------------------------------------------------------------------------------------------------------------------------------------------------------------------------------------------------------------------------------------------------------------------------------------------------------------------------------------------------------------------------------------------------------------------------------------------------------------------------------------------------------------------------------------------------------------------------------------------------------------------|--|
| <p>78. Do you have or have you had warts on your penis or vagina? __ (1) Yes (2) No</p> <p>79. Have you ever had sexual intercourse with a non-injecting illicit drug user partner? __ (1) Yes (2) No</p> <p>80. Have you ever had sex with an injecting drug user? (1) Yes (2) No</p> <p>81. Have you ever had sex with a partner with HIV? __ (1) Yes (2) No</p> <p>82. Have you ever had sexual intercourse with a partner with syphilis? __ (1) Yes (2) No</p> <p>83BR Have you ever had sexual intercourse with a partner with hepatitis? __ (1) Yes (2) No</p> <p>84. Do you have a steady sexual partner? __ (1) Yes (2) No</p> <p>85. If yes, for how many years?</p> <p>86. What is the number of partners in the last 5 years? __ __</p> <p>87. Are you a sex worker? __ (1) Yes (2) No</p> <p>88. Have you ever been a sex worker? __ (1) Yes (2) No</p> <p>89. Have you ever had sex for money or drugs? __ (1) Yes (2) No</p> <p>90. What is your sexual preference? __ (1) homosexual (2) heterosexual</p> <p>91. If you are heterosexual, have you ever had a homosexual relationship? __ (1) Yes (2) No</p> <p>92. Do you use condoms during sexual intercourse? __ (1) Yes (2) No</p> <p>93. Have you ever shared syringes/needles? __ (1) Yes (2) No</p> <p>94. Have you ever shared objects for tattooing, pliers, shaving equipment, for using inhaled drugs? __ (1) Yes (2) No</p> <p>95. Have you ever had any surgery? __ (1) Yes (2) No</p> <p>96. If so, what year? _____</p> <p>97. Have you ever had a hepatitis B vaccine? __ (1) Yes (2) No</p> <p>98. If yes, how many doses?</p> |  |
| <b>BLOCK F - EXAMINATIONS CARRIED OUT - post-testing</b>                                                                                                                                                                                                                                                                                                                                                                                                                                                                                                                                                                                                                                                                                                                                                                                                                                                                                                                                                                                                                                                                                                                                                                                                                                                                                                                                                                                                                                                                                                                                                        |  |
| <p><b><u>Serologies</u></b></p> <p>99. Blood collection date: __/__/____</p> <p>100. Rapid test for syphilis: __ (1)Reagent (2) Non-reactive</p> <p>101. Rapid HIV test: __ (1)Reactive (2) Non-reactive</p> <p>102. Hepatitis B rapid test: __ (1)Reactive (2) Non-reactive</p> <p>103. Hepatitis C rapid test: __ (1)Reactive (2) Non-reactive</p> <p>104. Anti-HIV 1/ 2: __ (1) Reagent (2) Non-reactive</p> <p>105. INNO-LIA III HCV Ab: __ (1)Reagent (2) Non-reactive</p> <p>106. Western Blot for HIV: __ (1)Reactive (2) Non-reactive</p> <p>107. Anti-Treponema pallidum IgG: __ (1)Reagent (2) Non-reactive</p>                                                                                                                                                                                                                                                                                                                                                                                                                                                                                                                                                                                                                                                                                                                                                                                                                                                                                                                                                                                       |  |

## Questionnaire: Indigenous Population

|                                                                           |  |
|---------------------------------------------------------------------------|--|
| 108. Anti- <i>Treponema pallidum</i> IgM: __ (1)Reagente (2) Não-reagente |  |
| 109. HBsAg: __ (1)Reagente (2) Não-reagente                               |  |
| 110. Anti-HBs: __ (1)Reagente (2) Não-reagente                            |  |
| 111. Anti-HBc total: __ (1)Reagente (2) Não-reagente                      |  |
| 112. Anti-HCV: __ (1)Reagente (2) Não-reagente                            |  |
